# 1 Mitochondrial sequences or Numts –

## 2 By-catch differs between sequencing

### 3 methods

4 Running title: Numts in long-read data

5 Authors:

6 Hannes Becher<sup>1,2</sup> & Richard A Nichols<sup>1</sup>

7 <sup>1</sup> Queen Mary University of London, School of Biological and Chemical Sciences

8 <sup>2</sup> Present address: University of Edinburgh, Institute of Evolutionary Biology

9

#### 10 **Abstract**

11 Nuclear inserts derived from mitochondrial DNA (Numts) encode valuable information.  
12 Being mostly non-functional, and accumulating mutations more slowly than mitochondrial  
13 sequence, they act like molecular fossils – they preserve information on the ancestral  
14 sequences of the mitochondrial DNA. In addition, changes to the Numt sequence since their  
15 insertion into the nuclear genome carry information about the nuclear phylogeny. These  
16 attributes cannot be reliably exploited if Numt sequence is confused with the mitochondrial  
17 genome (mtDNA). The analysis of mtDNA would be similarly compromised by any confusion,  
18 for example producing misleading results in DNA barcoding that used mtDNA sequence.

19 We propose a method to distinguish Numts from mtDNA, without the need for  
20 comprehensive assembly of the nuclear genome or the physical separation of organelles and  
21 nuclei. It exploits the different biases of long and short-read sequencing. We find that short-  
22 read data yield mainly mtDNA sequences, whereas long-read sequencing strongly enriches  
23 for Numt sequences. We demonstrate the method using genome-skimming (coverage < 1x)  
24 data obtained on Illumina short-read and PacBio long-read technology from DNA extracted  
25 from six grasshopper individuals. The mitochondrial genome sequences were assembled  
26 from the short-read data despite the presence of Numts. The PacBio data contained a much  
27 higher proportion of Numt reads (over 16-fold), making us caution against the use of long-  
28 read methods for studies using mitochondrial loci. We obtained two estimates of the  
29 genomic proportion of Numts. Finally, we introduce “tangle plots”, a way of visualising Numt  
30 structural rearrangements and comparing them between samples.

31

32 Keywords: mitochondrial genome, plastid, Numt content, Illumina, PacBio, tangle plot

33

## 34 **Introduction**

35 Sequences of mitochondrial DNA have proved indispensable markers for population genetics  
36 and phylogenetics for decades (Avice et al., 1987; Ballard & Rand, 2005). More recently,  
37 numerous ecological experiments have exploited the universal animal barcoding marker,  
38 COX1, which is a mitochondrial gene (Hebert, Ratnasingham, & deWaard, 2003). One  
39 valuable property of mitochondrial sequences is that, being more abundant, they tend to be

40 more effectively amplified by PCR than nuclear sequences, in particular in difficult or  
41 degraded samples. Mitochondrial markers are therefore widely used in research on museum  
42 specimens (Anmarkrud & Lifjeld, 2017), ancient DNA studies (Baca et al., 2018; Mohandesan  
43 et al., 2017) and analyses of faecal samples (van der Valk, Lona Durazo, Dalén, & Guschanski,  
44 2017). A second advantage is that, thanks to their comparatively small size (approximately  
45 16 kbp) and conserved structure (Boore, 1999) animal mitochondrial genomes are easy to  
46 assemble. Similar considerations make plastid genomes particularly valuable in genetic  
47 analysis of plants (Twyford & Ness, 2016).

48 The advantages of mtDNA analysis can be negated by the presence of Numts: nuclear inserts  
49 derived from mitochondrial DNA (and in plants, the plastid equivalent, Nupts). Evidence of  
50 such insertions was first found shortly after mitochondria were discovered to contain their  
51 own genetic material (Du Buy & Riley, 1967) and it has since become clear that Numts are  
52 present in many species (Bensasson, Zhang, Hartl, & Hewitt, 2001), often in multiple copies.

53 The abundance of Numts strongly depends on whether a species has one or more  
54 mitochondria per cell, an observation which led Barbrook, Howe, & Purton (2006) to  
55 postulate a limited transfer window.

56 The confusion of Numts and mitochondrial sequence could lead to incorrect interpretations  
57 of molecular genetics studies (Blacket, Semeraro, & Malipatil, 2012; Hawlitschek et al., 2017;  
58 Jordal & Kambestad, 2014; Kim, Lee, & Ju, 2013; Thalmann, Hebler, Poinar, Pääbo, &  
59 Vigilant, 2004; Zhang & Hewitt, 1997). Any study targeting mitochondrial sequences will  
60 therefore benefit from knowledge of the genomic content of Numts.

61 While Numts are commonly seen as a nuisance, they are fascinating study objects in their  
62 own right. Accruing substitutions more slowly than the mitochondrial DNA lineage, they act  
63 as “molecular fossils” providing information about the ancestral mitochondrial sequence  
64 (Lopez, Yuhki, Masuda, Modi, & O’Brien, 1994; Thalmann, Serre, et al., 2004). Some can be  
65 distinguished, because substitutions which have accumulated since integration into the  
66 nucleus have a high incidence of non-synonymous changes relative to mtDNA (Bensasson,  
67 Zhang, & Hewitt, 2000). Such Numts can be used as genetic markers, for example providing  
68 evidence of past episodes of hybridisation between taxa (Brelsford, Mila, & Irwin, 2011;  
69 Miraldo, Hewitt, Dear, Paulo, & Emerson, 2012).

70 Before high-throughput sequencing data became readily available, Numts could be detected,  
71 albeit with some difficulty, by PCR-based methods (Bensasson et al., 2000) or cytologically,  
72 by *in situ* hybridisation of mitochondrial sequences to chromosomal preparations (Gellissen,  
73 Bradfield, White, & Wyatt, 1983). To physically separate mitochondrial and nuclear DNA,  
74 (ultra) centrifugation can be used (Garber & Yoder, 1983; Lansman, Shade, Shapira, & Avise,  
75 1981), but these methods require considerable technical effort. Since the advent of high-  
76 throughput sequencing data, two further approaches have been applied to identifying  
77 Numts. (1) In well-assembled genomes sequenced at high coverage, Numts can be detected  
78 simply by screening the assembly for regions with similarity to mitochondrial DNA (Hazkani-  
79 Covo, Zeller, & Martin, 2010). Where genomic data has been assembled for multiple  
80 individuals, as in humans, insertion/deletion polymorphism for Numts can be readily studied  
81 (Dayama, Emery, Kidd, & Mills, 2014). (2) In absence of a well-assembled genome, for  
82 instance in genome skimming studies (Dodsworth, 2015; Straub et al., 2012), Numts may be

83 identified if reads (or read pairs) match the mitochondrial sequence for only part of their  
84 length. Otherwise, if the whole of the read maps to the mitochondrial genome, it may be  
85 possible to classify its Numt origin if the sequence has diverged from the mitochondria.  
86 Those that have not diverged sufficiently to be distinguished are termed "cryptic Numts"  
87 (Bertheau, Schuler, Krumböck, Arthofer, & Stauffer, 2011).

88 In this paper, we develop a further approach that investigates Numts by making use of the  
89 "by-catch" from High-throughput sequencing. We use this term to emphasise that much  
90 sequencing data is superfluous to the aims of a specific experiment, often the huge majority.  
91 The low price of sequencing data means these data could be discarded; yet this genomic by-  
92 catch can be mined for valuable incidental information. In particular it can be used to  
93 assemble genomes of organelles such as mitochondria. The choice of sequencing platform  
94 may influence the type of by-catch produced, particularly because of differences in  
95 fragmentation and size-selection protocols. We show that this difference can be exploited to  
96 investigate the Numt content of the genome.

97 In order to outline our approach, it is helpful to divide the data generated from a sequencing  
98 library into fractions (see Figure 1). The first major division is between A – reads without  
99 similarity to mitochondrial sequences and ML – mitochondrial-like sequences (i.e. those  
100 which align to the mitochondrial genome). This ML fraction may conceptually be subdivided  
101 further into D – those which can be identified as Numt sequences (i.e. sequences aligning for  
102 their full length but having a different sequence, or aligning for part of their length), C –  
103 cryptic Numts indistinguishable from actual mitochondrial sequences, and M – sequences  
104 derived from actual mitochondrial genomes. Fractions A, C, and D are derived from nuclear

105 DNA (fraction N, comprising A + C + D). In our analysis we assume that their ratios are  
106 effectively constant among individuals from the same species. For instance, the proportion  
107 of obvious Numts in the nuclear genome D/N should be constant. The size of fraction M,  
108 which is contributed by mitochondria, may differ between samples because of differences in  
109 the number of mitochondria per cell with tissue, sex, or developmental stage (Fernández-  
110 Vizarra, Enríquez, Pérez-Martos, Montoya, & Fernández-Silva, 2011). This will cause  
111 difference in M among samples, which will be observed in differences in the ratios of A and  
112 ML in different individual samples.

113 Here we demonstrate two complementary approaches for estimating the proportion the  
114 nuclear genome made up of Numts. One exploits the variation in M from sample to sample  
115 in short-read data, which arises because of differences in the mitochondrial composition  
116 with tissue, sex, or developmental stage. Secondly in some types of long-read data M is  
117 minimal, so the ratio can be calculated directly. We demonstrate these approaches using  
118 genome skimming data (coverage < 1/3x) generated by short-read (Illumina's NextSeq) and  
119 long-read (PacBio's RSII) platforms from the grasshopper, *Podisma pedestris*. We assemble  
120 the species's mitochondrial genome sequence and calculate these two estimates of the  
121 proportion of Numts in the nuclear genome. We also introduce a method, which we call  
122 "tangle plots", for the visualisation of Numts with structural re-arrangements

123

124

## 125 **Materials and Methods**

### 126 **Samples and sequencing**

127 Information about the samples can be found in Table 1.

128

129

### 130 **Illumina NextSeq**

131 Freshly removed hindlegs of *Podisma pedestris* were snap-frozen and stored at -79 °C.

132 Before DNA extraction, the legs were dipped into boiling water to inactivate DNases.

133 Subsequently, the denatured femur muscle was dissected out. DNA was then extracted using

134 a Qiagen Blood and Tissue kit following the manufacturer's instructions. Using a Covaris ultra

135 sonicator the DNA was sheared aiming to achieve a median size of 550 bp. Libraries for

136 sequencing were prepared using an Illumina TruSeq DNA PCR-Free kit. Sequencing was

137 carried out at QMUL's Genome Centre on Illumina's NextSeq Platform using v2 chemistry.

### 138 **PacBio RSII**

139 Freshly removed hindlegs were stored in pure ethanol. DNA was extracted from four

140 samples using a Qiagen Genra HMW kit resulting in molecules with a length of

141 mainly > 48 kbp (TapeStation, Agilent Genomics). Further work was carried out by The

142 University of Liverpool's Centre for Genomic Research. The aimed size for DNA

143 fragmentation was 10 kbp. The libraries' median (non-redundant) insert sizes were 3125,

144 3167, and 2097 bp. Sequencing was carried out on a PacBio RSII machine using C6 chemistry.

145 All PacBio data were obtained as circular consensus sequences (CSSs) in FASTQ format.

146 These are of a higher per-base quality than the raw reads, because they are generated from  
147 multiple reads generated from the same circular template.

## 148 **Data cleaning**

149 Two sets of clean NextSeq data were prepared. For the RepeatExplorer analysis (see below),  
150 the data were filtered using a custom python script keeping only read pairs where 90 % of  
151 the bases had a phred quality score > 20. Pairs matching the TruSeq adapters (detected by  
152 BLASTn num\_alignments 1) were discarded to remove adapter dimers.

153 A second cleaned set of NextSeq data was generated for mapping and variant calling. Here,  
154 we aimed to remove as many low-quality base calls as possible. The first 5 bp of each read  
155 were removed and, using Skewer (Jiang, Lei, Ding, & Zhu, 2014), each 3' end was trimmed  
156 until the last base had a phred quality 30 or higher.

157 For the RepeatExplorer analysis of PacBio data, pseudo paired reads of 151 bp with an insert  
158 size of 550 bp were cut out of long PacBio reads using custom-made python scripts which  
159 depend on the biopython module, <http://biopython.org/> (Cock et al., 2009).

## 160 **RepeatExplorer analyses**

161 RepeatExplorer (<https://galaxy-elixir.cerit-sc.cz/>, Novák, Neumann, Pech, Steinhaisl, &  
162 Macas, 2013) is a pipeline for analysing the repetitive genome content from short-read  
163 genome skimming data. It performs an all-to-all comparison and generates clusters of similar  
164 reads, which often correspond to particular genomic repeats such as transposable elements  
165 or satellites. Mitochondrial genomes and ribosomal RNA genes (rDNA), which are present in  
166 high copy numbers, are usually picked up as well.



167 RepeatExplorer was run twice. The first run was used to assemble a reference sequence for  
168 the *Podisma pedestris* mitochondrial genome, from the NextSeq reads. In the second run,  
169 100,000 NextSeq read pairs from each of six individuals (N1-N6) and 150,000 PacBio pseudo  
170 read pairs from each of three individuals (P1-P3) were analysed jointly to compare the  
171 sequencing methods. The pipeline was supplied with a custom annotation database  
172 containing the mitochondrial genome sequence of *Schistocerca gregaria* [Genebank  
173 NC\_013240.1 (Erlor, Ferenz, Moritz, & Kaatz, 2010)] in the first round and with the *Podisma*  
174 *pedestris* rDNA and mitochondrial genome in the second run.

### 175 **Mitochondrial sequence assembly**

176 Eight RepeatExplorer clusters connected by paired reads (244 - 57 - 230 - 205 - 69 - 85 - 102 -  
177 161) showed sequence similarity to *S. gregaria* mitochondrial DNA. Those clusters  
178 overlapping consensus sequences were assembled in Geneious R9, forming a reference to  
179 which reads of sample N1 were mapped. High coverage and truncated reads at the control  
180 region indicated a duplication, which was then added to the reference. Subsequently, each  
181 of the six NextSeq samples' sequencing data were mapped individually using BWA (Li &  
182 Durbin, 2009) with the following command line: `bwa mem -t <no of threads>`  
183 `<reference> <(zcat read files)>`. For each of the six alignments, 50 % majority rule  
184 consensus sequences were created in Geneious. They were annotated automatically using  
185 the MITOS WebServer (Version 2 beta, Bernt et al., 2013). Our mitochondrial genome  
186 assemblies were checked by re-assembling the short-read data with NOVOPlasty  
187 (Dierckxsens, Mardulyn, & Smits, 2016), which produced essentially the same sequences.

## 188 **Mapping and variant detection**

189 In order to detect individual-specific variants, a second round of mapping was carried out  
190 with NextSeq data. Polymorphisms were called using Geneious's function "Find  
191 Variations/SNPs" with default settings and a minimum allele frequency set to 0.01. The  
192 resulting tables were exported to CSV format and were processed interactively in R 3.3.1 (R  
193 Core Team, 2016).

194 All PacBio reads were aligned to the mitochondrial assembly using the LAST suite (Kielbasa,  
195 Wan, Sato, Horton, & Frith, 2011). In brief, the reference genome was masked in regions  
196 with GC-content below 10 % and was subsequently converted to a LAST database using the  
197 scoring scheme NEAR, preserving all masked regions and additionally masking simple  
198 repeats (optimised for high AT-content). Lastal was then run with parameter D set to one  
199 thousand times the length of the assembly (corresponding to an e-value of 1e-3 in BLAST).  
200 Of the resulting hits, only those with alignment lengths above 100 bp were kept. Shorter  
201 ones tended to map to in regions of low complexity, not permitting meaningful conclusions  
202 about homology.

## 203 **Assessment of sequencing bias and genomic proportion of Numts**

204 The output of the comparative (i.e. second) RepeatExplorer run was used to assess  
205 sequencing technology-specific bias (see Fig. 2).

## 206 **Illumina data**

207 Sequencing reads of the mitochondrial-like fraction (ML, see Fig. 1) could either have  
208 originated from mitochondrial genomes (M) or from Numts (fractions C and D). Assuming  
209 each of the individuals contained the same genomic proportion of Numts, the variation  
210 between samples in the relative proportion of ML in the NextSeq data (see Tab. 1) would be  
211 attributed to different mitochondrial densities in the extracts (varying proportion of M). One  
212 estimate of the proportion of Numt sequences reads can be obtained from the assumption  
213 that most mtDNA in any one individual is monomorphic, whereas some of the Numt  
214 sequences will be fixed for a different allele (because mtDNA tends to evolve faster than  
215 Numts). In this case, the frequency of this Numt allele will be proportional to the relative  
216 contribution of Numts. The maximum of the distribution of allele frequencies (shown as  
217 horizontal bands of dots in Fig. 4) provides an estimate for the relative contribution of  
218 Numts to the data mapping to each mitochondrial assembly.

219 This assumption is supported by the very close correlation ( $R^2=0.93$ ,  $p=0.001$ ) between the  
220 maximum allele frequency and the proportion of reads (A) which are not mitochondrial-like.

221

## 222 **PacBio data**

223 The estimate of M from the PacBio data was estimated as follows. CCSs aligning only  
224 partially (< 95%) were considered Numt-derived. Reads matching along > 95 % of their  
225 length were considered full-length matches. For these, alignment error profiles were  
226 compared to the reads' phred quality scores. If an alignment contained significantly more

227 mismatches than expected (5 % confidence interval, one-sided, Bonferroni-corrected for 59  
228 alignments), it was considered a Numt sequence. The remainder of the full-length matches  
229 were provisionally classified as mitochondrial, belonging to fraction M.

## 230 **Tangle plots**

231 Code to reproduce the example shown in figure 5, as well as explanations, and distance  
232 computation can be found in the GitHub repository “tangles”. See also supplemental  
233 information ( <https://github.com/SBCSnicholsLab/tangles> ), which contain explanations and  
234 another example.

## 235 **Results**

### 236 **Six mitochondrial genome assemblies**

237 We assembled the mitochondrial genome sequences of six individuals of *Podisma pedestris*  
238 (each of our short-read genome-skimming datasets) using contigs produced by the  
239 RepeatExplorer pipeline (Novák et al., 2013). RepeatExplorer generates “clusters” of  
240 decreasing size corresponding to repetitive DNA sequences in the samples analysed.  
241 RepeatExplorer contigs with similarity to the mitochondrial genome of the desert locust,  
242 *Schistocerca gregaria*, were merged in Geneious R9 and a 383-pb direct repeat, which had  
243 been collapsed, was adjusted manually after mapping each sample’s reads back to the  
244 respective assembly. To check the reliability of this approach, we re-assembled the  
245 mitochondrial genome from each data set with NOVOPlasty, yielding essentially the same

246 sequences, the differences being around the control region; for example NOVOPlasty did not  
247 assemble the repeat in 3 cases.

248 Each of our assemblies is 16,008 bp in length. The average mapping depth varies between  
249 samples from several hundred to few thousand-fold, which could be due to differences in  
250 cellular content of mitochondria between individuals (Tab. 1). All genes typically found in  
251 animals were identified using the MITOS WebServer v2beta (Fig. 3A). The gene order is  
252 collinear with other grasshopper mitochondrial genomes, and the sequences align readily  
253 (see alignment in supplementary file S1).

254 The alignment of all six consensus sequences contains 18 variable sites, five of which show  
255 population-specific polymorphisms (Fig. 3B). A neighbour-joining tree shows that each  
256 population's individuals have sequences most similar to one other (see tree in  
257 supplementary data S2). The PacBio data did not yield enough mitochondria-like sequence  
258 to attempt an assembly, see below.

259

### 260 **The amount of ML data differs between sequencing methods**

261 The proportion of each dataset with similarity to mitochondrial sequences (mitochondrial-  
262 like, ML in Fig. 1) was identified by mapping reads back to the assembly (of sample N1). It  
263 can be seen from Tab. 1 that the ML fraction in short read data (proportion of reads) is at  
264 least one order of magnitude larger than the ML fraction in long-read data (sum of read  
265 lengths) in all samples.

## 266 **High-abundance sequences differ between Illumina and PacBio data**

267 Because of the comparatively low coverage of the genome skimming data generated, it is  
268 only possible to compare sequences that are very abundant in the libraries sequenced, such  
269 as genomic repeats and organelle DNA. In order to compare the data generated by PacBio  
270 and Illumina sequencing, we used RepeatExplorer; an pipeline that generates clusters  
271 corresponding to high-abundance sequences. If both Illumina and PacBio sequencing were  
272 unbiased in their representation of the DNA found in our samples, then each cluster should  
273 contain similar proportions of PacBio and Illumina data, corresponding to the amount of  
274 data put into RE. The proportion of short-read data in each of the 300 largest clusters is  
275 shown in Fig. 3 (on a logarithmic scale). As is commonly seen, the short-read data contain  
276 fewer sequences with higher GC content (Ekblom, Smeds, & Ellegren, 2014). While this bias  
277 is between  $\frac{1}{4}$  and 4-fold for most clusters, the mitochondrial-like clusters (circles in Fig. 3)  
278 show the most extreme values (at least 16-fold enrichment in our short-read data).  
279

## 280 **Short reads: Polymorphism in individual-specific alignments**

281 SNPs were called within each alignment of individual-specific short ML reads. The minimum  
282 minor allele frequency set to 1 % to avoid erroneous calls due to sequencing errors. All  
283 assemblies contain numerous polymorphic sites with low to medium minor allele  
284 frequencies, which can be interpreted as variants present in Numts (dots in Fig. 4). The fact  
285 that we find appreciable allele frequencies even though we sequenced only a fraction of  
286 each genome, strongly suggests that there a multiple Numt insertions present in each  
287 sample. The distributions of these allele frequencies are skewed towards 0 with maxima

288 varying between samples (the extremes are 7 % and 20 % in samples N5 and N6,  
289 corresponding to the narrowest and widest band in Fig. 4). Over all samples, there is a  
290 correlation between fraction D (distinguishable Numts) and fraction A (without sequence  
291 similarity to mitochondrial genomes). The slope of the linear regression represents the  
292 genomic proportion of distinguishable Numts in *P. pedestris*. It is  $9 \times 10^{-04}$  ( $p=1.04 \times 10^{-3}$ ) with a  
293 standard error of  $1 \times 10^{-4}$ . As expected, the intercept is not significantly different from zero  
294 ( $p=0.805$ ), see Supplemental figure S6.

295 In total, there are four SNPs with frequencies that are clear outliers from the frequency  
296 distribution (shown by arrows in Fig. 4). Interestingly, individuals N1 and N3 from Le Blayeul  
297 share one such polymorphism at base pair 7567. These high-frequency variants are  
298 presumably the signatures of heteroplasmy (as seen by Mao et al., 2014 in bats).

299

### 300 **Tangle plots: Atypical distances between read-pairs as a signature of Numts**

301 Paired reads mapped to the mitochondrial assembly could have originated from  
302 mitochondrial genomes (M fraction) or from Numts. Those from the M fraction should show  
303 intra-pair distances consistent with the libraries' insert sizes, since the mitochondrial  
304 genome is highly conserved. Conversely, Numt sequences may have been subject to  
305 insertions, deletions, or rearrangements resulting in longer distances between map locations  
306 on the mitochondrial genome or discordant read orientations. The majority of intra-pair  
307 differences fell into a distribution with a maximum around 400 bp representing the  
308 sequencing insert size (supplemental data S3). There is a second (much shallower) peak

309 above 15,000 bp resulting from mapping reads generated from circular molecule to a  
310 linearised reference.  
311 There is a small subset of read pairs with intermediate mapping distances that might be  
312 attributed to Numt sequences containing deletions or rearrangements. Fig. 5 shows each of  
313 these intermediate read pairs (those with an intra-pair distance between 1500 bp 14,508 bp)  
314 as a line connecting the paired reads' positions resulting in "tangle plots". Interestingly,  
315 some of the lines shown cluster together. Given the low sequencing coverage, this strongly  
316 suggests the presence of multiple copies of some Numts. Some patterns are shared across  
317 multiple samples, but the overall patterns are not population-specific (a linear discriminant  
318 analysis failed to assign all individuals to the correct populations, not shown here).

319

320

### 321 **Mapping PacBio reads**

322 PacBio circular consensus sequences (CCS) generated from DNA of three individuals  
323 (samples P1-P3) were mapped to the mitochondrial assembly. Out of 297,899 non-  
324 redundant reads generated in total, 443 showed similarity to the mitochondrial assembly  
325 with a cumulative mapping length of 396,770 bp. Of these, most reads matched the  
326 mitochondrial reference only along a part of their length, a pattern expected for short  
327 Numts and also chimeric PacBio read (which we expect to be rare). The alignments cover  
328 263,635 bp, which corresponds to 0.027 % of the total CCS data generated. There were only  
329 59 PacBio CCSs matching full-length, of which 41 were sufficiently diverged from the  
330 mitochondrial sequence to meet or criterion for classification as Numts. These align along



331 96,210 bp corresponding to 0.01 % of the (non-redundant) PacBio data generated. The  
332 remaining 18 full-length matches could be derived from mitochondrial genomes, but they  
333 may well be derived from Numts inserted recently. Covering 36,925 bp, these ambiguous  
334 CCSs represent only 9.3 % of the ML fraction in the PacBio data.  
335 Interestingly, the mapping depth of full-length matches has a bimodal distribution. While the  
336 18 ambiguous matches contribute mostly to the first peak, Numt-derived CCSs map to the  
337 areas under both peaks (see Fig. 6).

## 338 **Discussion**

339 Both mitochondrial (M) and Numt (C+D) sequence are generated as side-products of  
340 sequencing experiments, analogous to by-catch on fishing trawlers. We investigated these  
341 sequences using genome-skimming data (less than 1/3x genomic coverage) from the  
342 grasshopper, *Podisma pedestris*, using Illumina's NextSeq and PacBio's RSII platforms with  
343 six and three biological replicates, respectively

### 344 **By-catch differs between sequencing methods**

345

346 One of the most striking results is that the Illumina data had over 16-fold higher frequency of  
347 reads mapping to the mitochondrial clusters than the PacBio data, suggesting that the  
348 Illumina protocol produced a correspondingly higher proportion of sequences from the  
349 mitochondria (the M fraction), at some point between extraction and data interpretation.  
350 This bias cannot be explained by the known general over-representation of sequences with  
351 low-GC sequences in Illumina reads (Ekblom et al., 2014), as shown by the deviation of the

352 mitochondrial clusters from the general trend in Fig. 3. The result is reinforced by the  
353 comparable bias shown in the estimates of the proportion of mitochondrial sequences  
354 classified as Numts (fraction D/ML). This value is also much higher in the PacBio data than  
355 the Illumina. In the PacBio case, the two D categories sum to 91% of ML (the D estimate is  
356 obtained from the length of the mitochondrial portion of partially matching PacBio sequence  
357 plus the length of diverged full-length matches). In the Illumina data, the D estimates  
358 obtained from the frequencies in Figure 4 are much smaller, lying between 7% and 20% of  
359 ML.

360 This enrichment could be due to the greater retention of mitochondrial sequence (fraction  
361 M) in the preparation of the short-read libraries. Short-read libraries are usually fragmented  
362 and size selected to produce a distribution of fragments around 350-550 bp long, which will  
363 include fragments of the mitochondrial genome. On the other hand library preparation for  
364 long-read sequencing involves more careful shearing and a subsequent size selection for  
365 longer fragments (around 3-4 kbp in this case). This may cause mitochondrial genomes,  
366 starting at 16kbp before shearing, to be differentially lost from PacBio libraries while Numts,  
367 being part of the nuclear DNA, would be represented in their natural proportion.

### 368 **Estimating the genomic proportion of Numts**

369 Building on the results presented above, there are two ways of estimating the genomic  
370 proportion of Numts in genome skimming data, which are possible even in the absence of a  
371 genome assembly. It is shown in Supplemental Information S6 that for our short-read data,  
372 there is a good correlation ( $R^2=0.93$ ) between the proportions of Numt-derived data reads  
373 (fraction D) and non-ML data (fraction A). The slope of this regression corresponds to the

374 estimated genomic proportion. It is 0.09 %. This is a lower-bound estimate, because it is  
375 based on sequence divergence between Numts and the mitochondrial genomes sequence.  
376 The estimate based on PacBio CCSs is somewhat lower; ML CCSs with divergent sequences  
377 amount for 0.01% of the PacBio data. Another class of CCSs, which match only along part of  
378 their sequence, are likely to represent Numts, too, however there is a small chance that  
379 some of them are derived from chimeric SMRT bells. These sequences amount for 0.027% of  
380 the PacBio data, giving a total of 0.037%.

### 381 **Genome size and Numt content**

382 *P. pedestris* has the largest genome of any insect listed in the Animal Genome Size Database  
383 (Gregory, 2016, accessed 24 June 2019). Its C-value of 16.93 corresponds to 16.5 Gbp  
384 (Doležel, Bartoš, Voglmayr, & Greilhuber, 2003). Consequently, a genomic proportion of just  
385 under 0.1 % is equivalent to about a thousand full length mitochondrial genomes inserted  
386 into the nuclear DNA (this length of sequence is equivalent to an entire *Drosophila*  
387 *melanogaster* or *Arabidopsis thaliana* chromosome). Although this is a surprisingly large  
388 number, as a proportion of the total genome it is consistent with estimates from other  
389 species. Hazkani-Covo et al. (2010) present estimates of Numt contents for a diverse list of  
390 85 species ranging from 0 to 0.25% in multicellular organisms. By contrast RepeatExplorer  
391 analyses suggest repeats account for approximately 70 % of the *P. pedestris* genome,  
392 including transposable elements able to excise and re-insert themselves, providing a  
393 mechanism for copy-number increase.

## 394 **Tangle plots**

395 In Fig. 5, we show tangle plots, which allow visual comparisons between Numts in multiple  
396 samples. The repeated occurrence of the same links within a sample suggest that rearranged  
397 mitochondrial sequence has been replicated within a single genome (the low coverage of <  
398  $\frac{1}{3}$ x makes repeated sequencing of the same region unlikely). The similar patterns in different  
399 individuals and populations suggest that many of these replicated insertions are fixed or  
400 occur at a high frequency. Given that they are unlikely to be functional, it is most plausible  
401 that they have spread by genetic drift.

402 Tangle plots can be used to visualise any short-read data sets mapped to a circular (or  
403 tandem-repetitive) reference, see Supplemental Information S7.

404

## 405 **Acknowledgements**

406 This research utilised Queen Mary's MidPlus computational facilities, supported by QMUL  
407 Research-IT and funded by EPSRC grant EP/K000128/1. Further computational resources  
408 were provided by the ELIXIR-CZ project (LM2015047), part of the international ELIXIR  
409 infrastructure. HB was funded by a PhD studentship of QMUL's School of Biological and  
410 Chemical Sciences. We wish to thank Graham Stone and Duncan Greig for their comments  
411 on an earlier version of the manuscript. We would also like to thank Alex Twyford for  
412 suggesting the name "tangle plot".

## 413 Literature Cited

- 414 [dataset]Becher, H., & Nichols, R. A.; 2019; Genome skimming data from the grasshopper  
415 *Podiums pedestris*; DataDryad; Persistent identifier (e.g. DOI)
- 416 Anmarkrud, J. A., & Lifjeld, J. T. (2017). Complete mitochondrial genomes of eleven extinct or  
417 possibly extinct bird species. *Molecular Ecology Resources*, 17(2), 334–341.  
418 doi:10.1111/1755-0998.12600
- 419 Avise, J. C., Arnold, J., Ball, R. M., Bermingham, E., Lamb, T., Neigel, J. E., ... Saunders, N. C.  
420 (1987). Intraspecific Phylogeography: The Mitochondrial DNA Bridge Between  
421 Population Genetics and Systematics. *Annual Review of Ecology and Systematics*, 18,  
422 489–522.
- 423 Baca, M., Popović, D., Panagiotopoulou, H., Marciszak, A., Krajcarz, M., Krajcarz, M. T., ...  
424 Nadachowski, A. (2018). Human-mediated dispersal of cats in the Neolithic Central  
425 Europe. *Heredity*, 121(6), 557–563. doi:10.1038/s41437-018-0071-4
- 426 Ballard, J. W. O., & Rand, D. M. (2005). The Population Biology of Mitochondrial DNA and Its  
427 Phylogenetic Implications. *Annual Review of Ecology, Evolution, and Systematics*, 36(1),  
428 621–642. doi:10.1146/annurev.ecolsys.36.091704.175513
- 429 Barbrook, A. C., Howe, C. J., & Purton, S. (2006). Why are plastid genomes retained in non-  
430 photosynthetic organisms? *Trends in Plant Science*, 11(2), 101–8.  
431 doi:10.1016/j.tplants.2005.12.004
- 432 Bensasson, D., Zhang, D.-X., Hartl, D. L., & Hewitt, G. M. (2001). Mitochondrial pseudogenes:  
433 evolution's misplaced witnesses. *Trends in Ecology & Evolution*, 16(6), 314–321.  
434 doi:10.1016/S0169-5347(01)02151-6
- 435 Bensasson, D., Zhang, D.-X., & Hewitt, G. M. (2000). Frequent Assimilation of Mitochondrial  
436 DNA by Grasshopper Nuclear Genomes. *Molecular Biology and Evolution*, 17(3), 406–  
437 415. doi:10.1093/oxfordjournals.molbev.a026320
- 438 Bernt, M., Donath, A., Jühling, F., Externbrink, F., Florentz, C., Frittsch, G., ... Stadler, P. F.  
439 (2013). MITOS: Improved de novo metazoan mitochondrial genome annotation.  
440 *Molecular Phylogenetics and Evolution*, 69(2), 313–319.  
441 doi:10.1016/j.ympev.2012.08.023
- 442 Bertheau, C., Schuler, H., Krumböck, S., Arthofer, W., & Stauffer, C. (2011). Hit or miss in  
443 phylogeographic analyses: the case of the cryptic NUMTs. *Molecular Ecology Resources*,  
444 11(6), 1056–1059. doi:10.1111/j.1755-0998.2011.03050.x
- 445 Blacket, M. J., Semeraro, L., & Malipatil, M. B. (2012). Barcoding Queensland Fruit Flies  
446 (*Bactrocera tryoni*): impediments and improvements. *Molecular Ecology Resources*,  
447 12(3), 428–436. doi:10.1111/j.1755-0998.2012.03124.x
- 448 Boore, J. L. (1999). Animal mitochondrial genomes. *Nucleic Acids Research*, 27(8), 1767–  
449 1780. doi:10.1093/nar/27.8.1767
- 450 Brelsford, A., Mila, B., & Irwin, D. E. (2011). Hybrid origin of Audubon's warbler. *Molecular*  
451 *Ecology*, 20(11), 2380–2389. doi:10.1111/j.1365-294X.2011.05055.x
- 452 Cock, P. J. A., Antao, T., Chang, J. T., Chapman, B. A., Cox, C. J., Dalke, A., ... de Hoon, M. J. L.  
453 (2009). Biopython: freely available Python tools for computational molecular biology  
454 and bioinformatics. *Bioinformatics*, 25(11), 1422–1423.

- 455 doi:10.1093/bioinformatics/btp163
- 456 Dayama, G., Emery, S. B., Kidd, J. M., & Mills, R. E. (2014). The genomic landscape of  
457 polymorphic human nuclear mitochondrial insertions. *Nucleic Acids Research*, *42*(20),  
458 12640–12649. doi:10.1093/nar/gku1038
- 459 Dierckxsens, N., Mardulyn, P., & Smits, G. (2016). NOVOPlasty: *de novo* assembly of  
460 organelle genomes from whole genome data. *Nucleic Acids Research*, *45*(4), gkw955.  
461 doi:10.1093/nar/gkw955
- 462 Dodsworth, S. (2015). Genome skimming for next-generation biodiversity analysis. *Trends in*  
463 *Plant Science*, *20*(9), 525–7. doi:10.1016/j.tplants.2015.06.012
- 464 Doležel, J., Bartoš, J., Voglmayr, H., & Greilhuber, J. (2003). Letter to the editor. *Cytometry*,  
465 *51A*(2), 127–128. doi:10.1002/cyto.a.10013
- 466 Du Buy, H. G., & Riley, F. L. (1967). Hybridization between the nuclear and kinetoplast DNA's  
467 of *Leishmania enriettii* and between nuclear and mitochondrial DNA's of mouse liver.  
468 *Proceedings of the National Academy of Sciences*, *57*(3), 790–797.
- 469 Ekblom, R., Smeds, L., & Ellegren, H. (2014). Patterns of sequencing coverage bias revealed  
470 by ultra-deep sequencing of vertebrate mitochondria. *BMC Genomics*, *15*(1), 467.  
471 doi:10.1186/1471-2164-15-467
- 472 Erler, S., Ferenz, H.-J., Moritz, R. F. A., & Kaatz, H.-H. (2010). Analysis of the mitochondrial  
473 genome of *Schistocerca gregaria gregaria* (Orthoptera: Acrididae). *Biological Journal of*  
474 *the Linnean Society*, *99*, 296–305. doi:10.1111/j.1095-8312.2009.01365.x
- 475 Fernández-Vizarra, E., Enríquez, J. A., Pérez-Martos, A., Montoya, J., & Fernández-Silva, P.  
476 (2011). Tissue-specific differences in mitochondrial activity and biogenesis.  
477 *Mitochondrion*, *11*(1), 207–213. doi:10.1016/j.mito.2010.09.011
- 478 Garber, R. C., & Yoder, O. C. (1983). Isolation of DNA from filamentous fungi and separation  
479 into nuclear, mitochondrial, ribosomal, and plasmid components. *Analytical*  
480 *Biochemistry*, *135*(2), 416–422. doi:10.1016/0003-2697(83)90704-2
- 481 Gellissen, G., Bradfield, J. Y., White, B. N., & Wyatt, G. R. (1983). Mitochondrial DNA  
482 sequences in the nuclear genome of a locust. *Nature*, *301*(5901), 631–634.  
483 doi:10.1038/301631a0
- 484 Gregory, T. (2016). Animal Genome Size Database. Retrieved from  
485 <http://www.genomesize.com>
- 486 Hawlitschek, O., Morinière, J., Lehmann, G. U. C., Lehmann, A. W., Kropf, M., Dunz, A., ...  
487 Haszprunar, G. (2017). DNA barcoding of crickets, katydids and grasshoppers  
488 (Orthoptera) from Central Europe with focus on Austria, Germany and Switzerland.  
489 *Molecular Ecology Resources*, *17*(5), 1037–1053. doi:10.1111/1755-0998.12638
- 490 Hazkani-Covo, E., Zeller, R. M., & Martin, W. (2010). Molecular Poltergeists: Mitochondrial  
491 DNA Copies (numts) in Sequenced Nuclear Genomes. *PLoS Genetics*, *6*(2), e1000834.  
492 doi:10.1371/journal.pgen.1000834
- 493 Hebert, P. D. N., Ratnasingham, S., & deWaard, J. R. (2003). Barcoding Animal Life:  
494 Cytochrome c Oxidase Subunit 1 Divergences among Closely Related Species.  
495 *Proceedings: Biological Sciences*, *270*, S96–S99.
- 496 Jiang, H., Lei, R., Ding, S.-W., & Zhu, S. (2014). Skewer: a fast and accurate adapter trimmer  
497 for next-generation sequencing paired-end reads. *BMC Bioinformatics*, *15*(1), 182.

- 498 doi:10.1186/1471-2105-15-182
- 499 Jordal, B. H., & Kambestad, M. (2014). DNA barcoding of bark and ambrosia beetles reveals  
500 excessive NUMTs and consistent east-west divergence across Palearctic forests.  
501 *Molecular Ecology Resources*, 14(1), 7–17. doi:10.1111/1755-0998.12150
- 502 Kielbasa, S. M., Wan, R., Sato, K., Horton, P., & Frith, M. C. (2011). Adaptive seeds tame  
503 genomic sequence comparison. *Genome Research*, 21(3), 487–493.  
504 doi:10.1101/gr.113985.110
- 505 Kim, S.-J., Lee, K. Y., & Ju, S.-J. (2013). Nuclear mitochondrial pseudogenes in *Austinograea*  
506 *alaysae* hydrothermal vent crabs (Crustacea: Bythograeidae): effects on DNA  
507 barcoding. *Molecular Ecology Resources*, 13(5), 781–787. doi:10.1111/1755-0998.12119
- 508 Lansman, R. A., Shade, R. O., Shapira, J. F., & Avise, J. C. (1981). The use of restriction  
509 endonucleases to measure mitochondrial DNA sequence relatedness in natural  
510 populations. *Journal of Molecular Evolution*, 17(4), 214–226.
- 511 Li, H., & Durbin, R. (2009). Fast and accurate short read alignment with Burrows-Wheeler  
512 transform. *Bioinformatics*, 25(14), 1754–1760. doi:10.1093/bioinformatics/btp324
- 513 Lopez, J. V., Yuhki, N., Masuda, R., Modi, W., & O'Brien, S. J. (1994). Numt, a recent transfer  
514 and tandem amplification of mitochondrial DNA to the nuclear genome of the domestic  
515 cat. *Journal of Molecular Evolution*, 39(2), 174–190. doi:10.1007/BF00163806
- 516 Mao, X., Dong, J., Hua, P., He, G., Zhang, S., & Rossiter, S. J. (2014). Heteroplasmy and  
517 Ancient Translocation of Mitochondrial DNA to the Nucleus in the Chinese Horseshoe  
518 Bat (*Rhinolophus sinicus*) Complex. *PLoS ONE*, 9(5), e98035.  
519 doi:10.1371/journal.pone.0098035
- 520 Miraldo, A., Hewitt, G. M., Dear, P. H., Paulo, O. S., & Emerson, B. C. (2012). Numts help to  
521 reconstruct the demographic history of the ocellated lizard (*Lacerta lepida*) in a  
522 secondary contact zone. *Molecular Ecology*, 21(4), 1005–1018. doi:10.1111/j.1365-  
523 294X.2011.05422.x
- 524 Mohandesan, E., Speller, C. F., Peters, J., Uerpmann, H.-P., Uerpmann, M., De Cupere, B., ...  
525 Burger, P. A. (2017). Combined hybridization capture and shotgun sequencing for  
526 ancient DNA analysis of extinct wild and domestic dromedary camel. *Molecular Ecology*  
527 *Resources*, 17(2), 300–313. doi:10.1111/1755-0998.12551
- 528 Novák, P., Neumann, P., Pech, J., Steinhaisl, J., & Macas, J. (2013). RepeatExplorer: a Galaxy-  
529 based web server for genome-wide characterization of eukaryotic repetitive elements  
530 from next-generation sequence reads. *Bioinformatics*, 29(6), 792–793.  
531 doi:10.1093/bioinformatics/btt054
- 532 R Core Team. (2016). R: A Language and Environment for Statistical Computing. Vienna,  
533 Austria: R Foundation for Statistical Computing.
- 534 Straub, S. C. K., Parks, M., Weitemier, K., Fishbein, M., Cronn, R. C., & Liston, A. (2012).  
535 Navigating the tip of the genomic iceberg: Next-generation sequencing for plant  
536 systematics. *American Journal of Botany*, 99(2), 349–64. doi:10.3732/ajb.1100335
- 537 Thalmann, O., Hebler, J., Poinar, H. N., Pääbo, S., & Vigilant, L. (2004). Unreliable mtDNA  
538 data due to nuclear insertions: a cautionary tale from analysis of humans and other  
539 great apes. *Molecular Ecology*, 13(2), 321–335. doi:10.1046/j.1365-294X.2003.02070.x
- 540 Thalmann, O., Serre, D., Hofreiter, M., Lukas, D., Eriksson, J., & Vigilant, L. (2004). Nuclear

541 insertions help and hinder inference of the evolutionary history of gorilla mtDNA.  
542 *Molecular Ecology*, 14(1), 179–188. doi:10.1111/j.1365-294X.2004.02382.x  
543 Twyford, A. D., & Ness, R. W. (2016). Strategies for complete plastid genome sequencing.  
544 *Molecular Ecology Resources*. doi:10.1111/1755-0998.12626  
545 van der Valk, T., Lona Durazo, F., Dalén, L., & Guschanski, K. (2017). Whole mitochondrial  
546 genome capture from faecal samples and museum-preserved specimens. *Molecular*  
547 *Ecology Resources*. doi:10.1111/1755-0998.12699  
548 Zhang, D.-X., & Hewitt, G. M. (1997). Insect mitochondrial control region: A review of its  
549 structure, evolution and usefulness in evolutionary studies. *Biochemical Systematics*  
550 *and Ecology*, 25(2), 99–120. doi:10.1016/S0305-1978(96)00042-7

551  
552  
553

## 554 **Data Accessibility**

555 Mito sequences aligned – Supplemental data S1  
556 Neighbour-joining tree – Supplemental data S2  
557 Distances of paired reads mapped – Supplemental data S3  
558 RE contigs – Supplemental data S4  
559 matching PacBio reads, SAM format, GZIP-compressed TAR ball – Supplemental data S5  
560 Regression plot – Supplemental data S6  
561 Information on tangle plots – Supplemental data S7 (see also GitHub:  
562 <https://github.com/SBCSnicholsLab/tangles>)  
563 The original sequencing data will be deposited on Dryad.

564

## 565 **Author Contributions**

566 HB and RAN conceived the experiment and collected samples. HB carried out the  
567 experiment, analysed the data, and wrote the manuscript. HB and RAN revised the  
568 manuscript.



569

570

571

## 572 **Tables**

573

574 Table 1. Overview of the sequencing data generated and fraction ML (mitochondrial-like,

575 mapping to the mitochondrial genome assembly).

| <b>NextSeq</b> | <b>Sample</b> | <b>Origin</b> | <b>High-quality<br/>reads</b> | <b>ML (% of<br/>reads)</b> | <b>Max SNP allele<br/>frequency</b> |
|----------------|---------------|---------------|-------------------------------|----------------------------|-------------------------------------|
|                | N1            | Blayeul       | 25600134                      | 0.48%                      | 15%                                 |
|                | N2            | Blayeul       | 37563526                      | 0.64%                      | 14%                                 |
|                | N3            | Blayeul       | 13034544                      | 1.17%                      | 8%                                  |
|                | N4            | Mariaud       | 35257122                      | 0.97%                      | 9%                                  |
|                | N5            | Mariaud       | 33393734                      | 1.32%                      | 7%                                  |
|                | N6            | Mariaud       | 21813470                      | 0.44%                      | 20%                                 |

  

| <b>PacBio</b> | <b>Sample</b> | <b>Origin</b> | <b>Reads (bp in CCS)</b> | <b>ML reads (bp)</b> |
|---------------|---------------|---------------|--------------------------|----------------------|
|               | PB1           | Blayeul       | 92971 (336152778 bp)     | 160 (0.04%)          |
|               | PB2           | Blayeul       | 97937 (376785844 bp)     | 131 (0.03%)          |
|               | PB3           | Bournee       | 106991 (248262810 bp)    | 152 (0.06%)          |

576

577 **Figures**

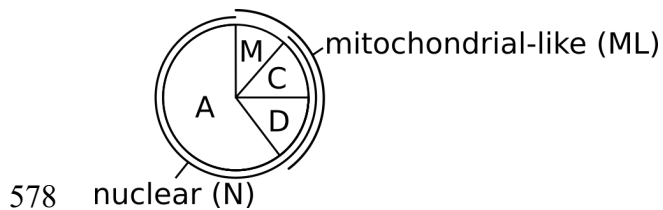

579 Figure 1. Fractionation of sequencing data. Of all the sequencing data generated from one  
580 sample, some fraction N will originate from the nuclear DNA and some fraction M from the  
581 mitochondrial DNA, and other sequences. The nuclear fraction N may contain Numts. Some  
582 of these will have sequences divergent from M and hence are easily identifiable (fraction D).  
583 Other Numts may be cryptic, e.g. recent insertions, (fraction C). Together, Numts and  
584 mitochondrial sequences for the fraction ML “mitochondrial-like”.

585

586

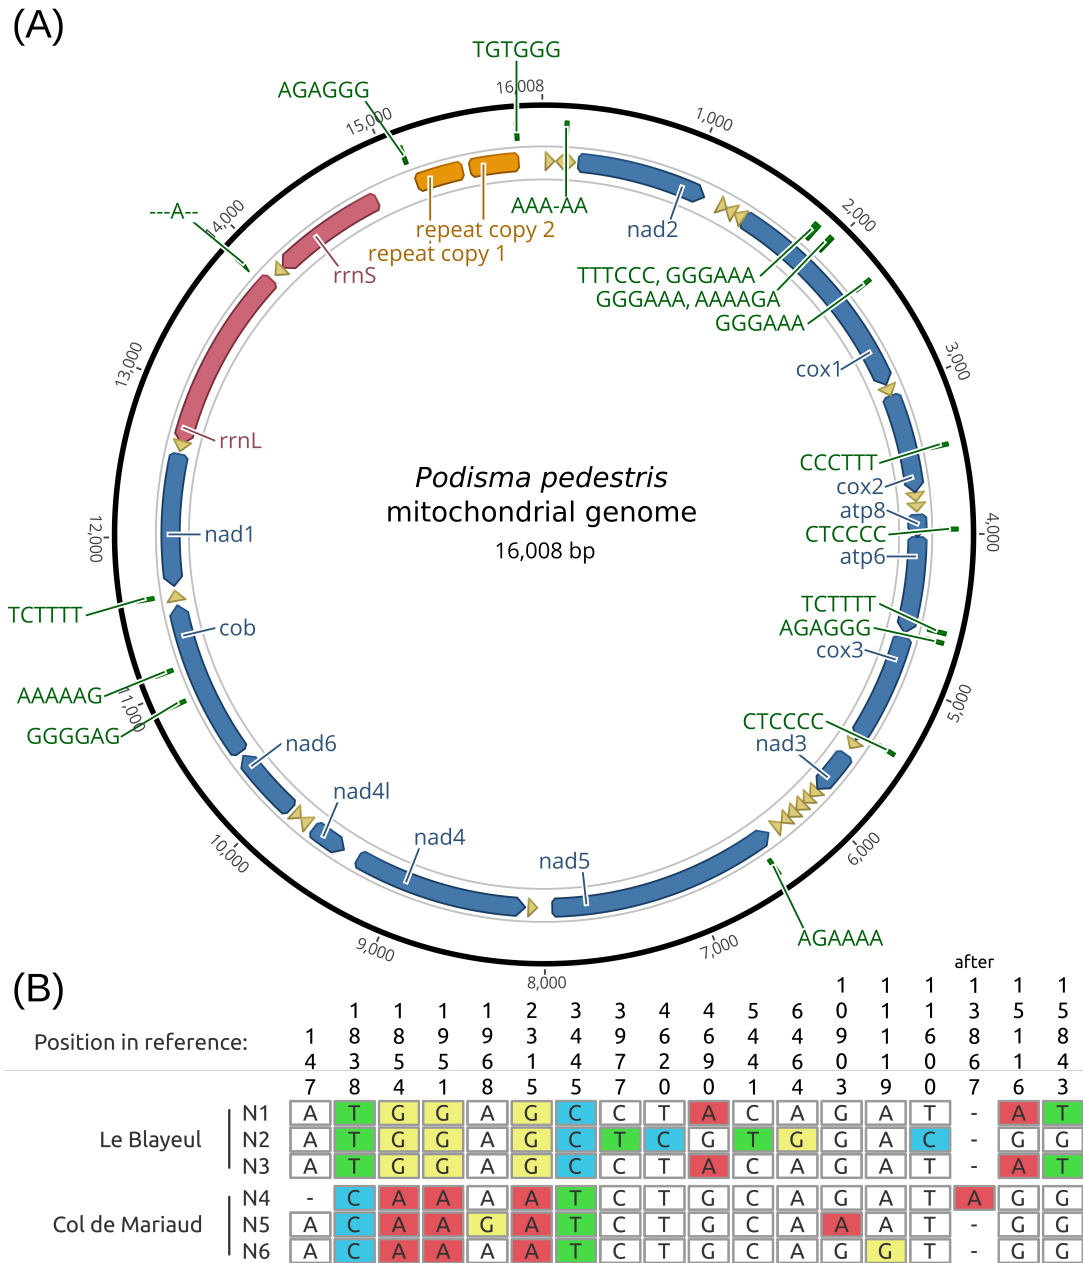

587 Figure 2. Annotated mitochondrial genome assembly of the alpine grasshopper, *Podisma*  
 588 *pedestris*, and between-individual polymorphisms. (A) Shows a representation of the  
 589 mitochondrial genome assembly. (B) The alignment of the six assemblies contains 18  
 590 polymorphic sites. Their positions are indicated above the alignment and in (A). Mismatches  
 591 are highlighted.  
 592

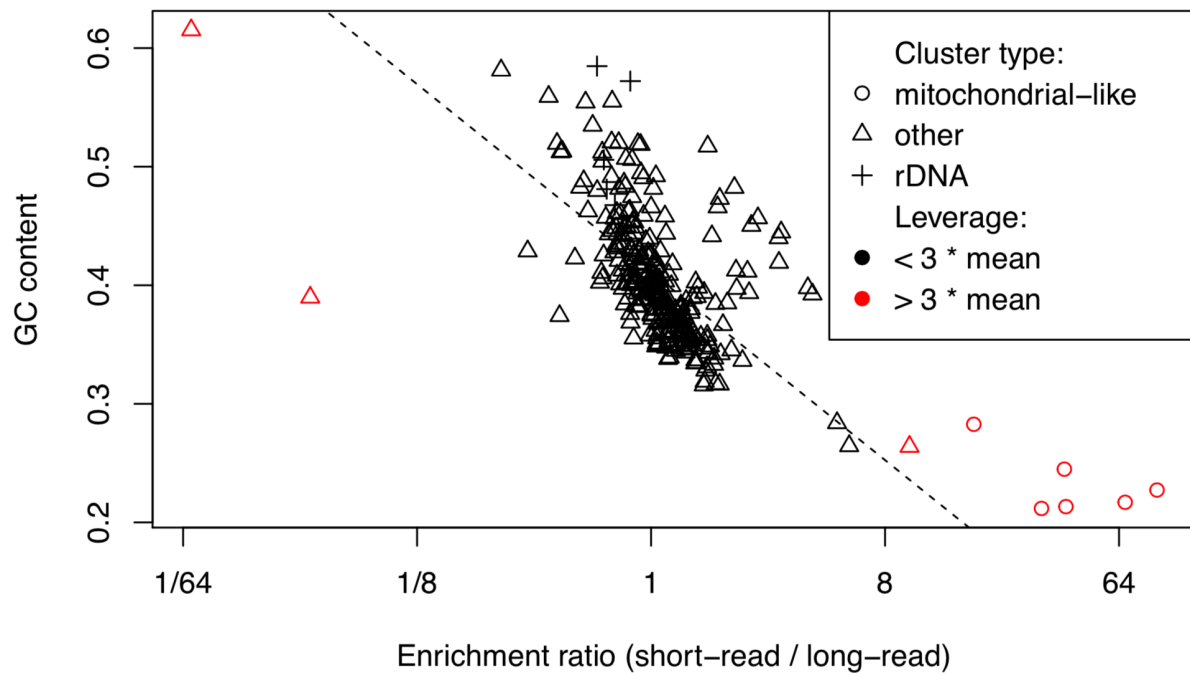

593  
594 Figure 3. Enrichment for short or long reads plotted against GC-content for 300  
595 RepeatExplorer clusters. Symbols right of the centre indicate high-abundance DNAs enriched  
596 in the short-read data. There is a general trend for enrichment in PacBio data for clusters  
597 with higher GC-content (regression line). Mitochondrial-like clusters, which show the  
598 strongest bias, are indicated as circles, rDNA as crosses. Data points with a leverage greater  
599 than three times the mean leverage are shown in red. These were excluded from the final  
600 regression (dashed line).

601

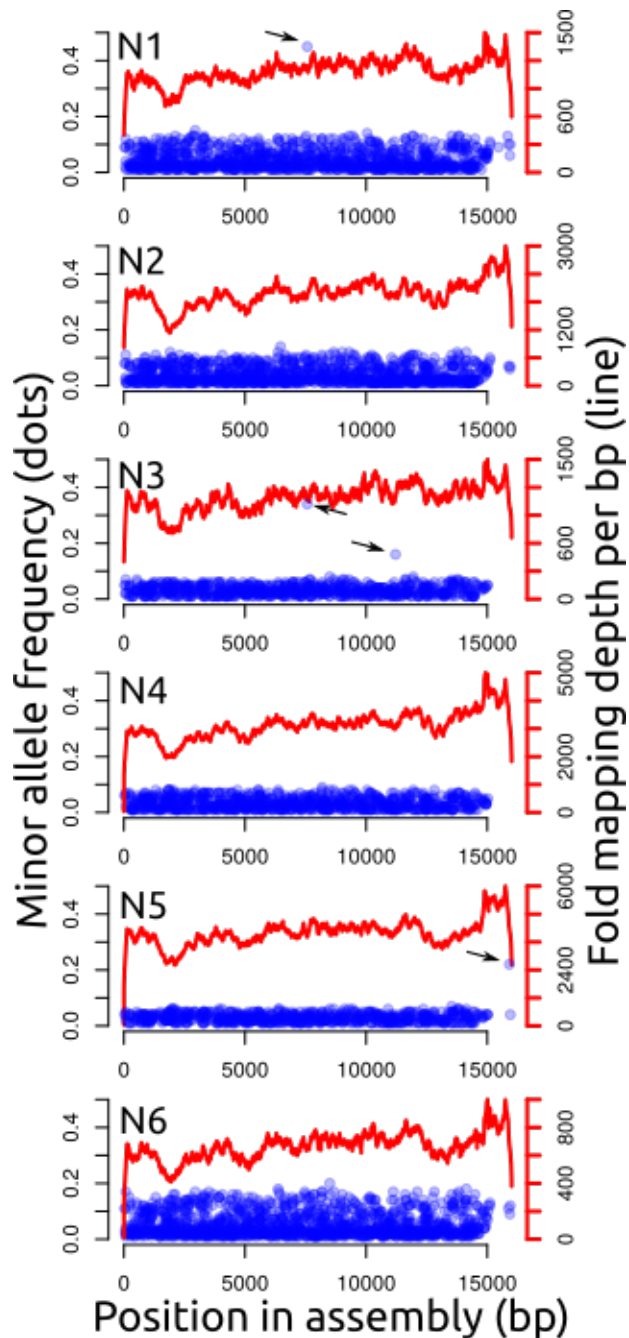

602 Figure 4. Polymorphisms within alignments. For each individual, the minor allele frequencies  
603 and positions of SNPs are shown as dots. Note, the dots generally form bands with widths  
604 differing between samples. There are few outliers, marked with arrows, likely indicating  
605 heteroplasmy. Individuals N1 and N3 share such a polymorphism at base pair 7567. The lines  
606 indicate per-base pair mapping depths.

607

608

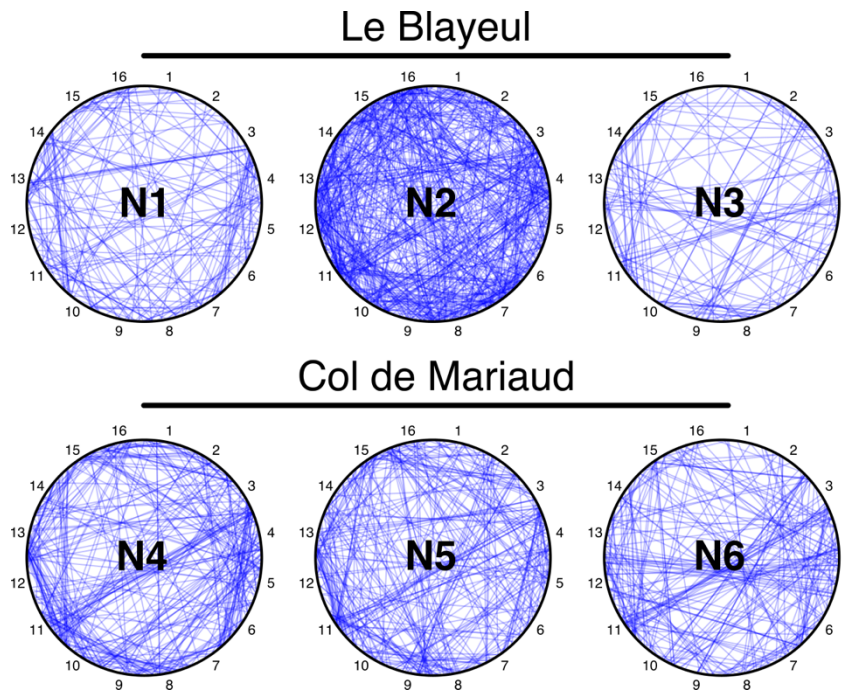

609

610 Figure 5. Tangle plots. The position of read pairs mapped with unusual read distances is  
611 indicated by a line connecting the read locations. For ease of comparison, 16 positions are  
612 labelled on each graph. Note common patterns between individuals. For instance, all  
613 individuals in the Col de Mariaud population show several read pairs connecting positions  
614 3/4 and 11. All samples of both populations show read pairs connecting segments 3/4 and 7.  
615

616

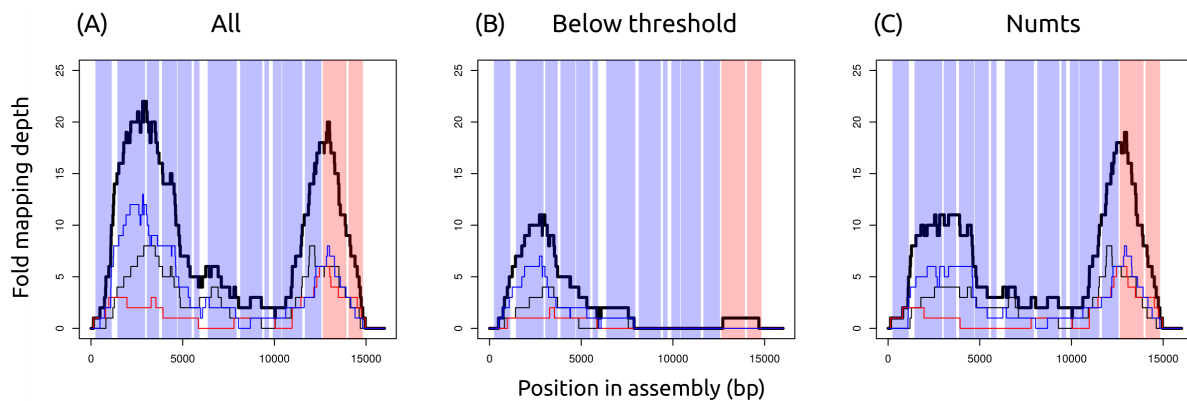

617

618 Figure 6. Mapping depths of PacBio CCSs mapping to mitochondria for their full-length. The  
619 bold line indicates the total over all three samples, narrow lines represent individual  
620 samples. Vertical shaded bands indicate the positions of protein-coding genes and  
621 mitochondrial rRNA genes (the two salmon coloured bands on the far right). (A) All CCSs  
622 matching full-length. (B) Fraction M or C (either mitochondrial or cryptic Numt) (C) Fraction  
623 D (classified as a Numt).

624
